# Supplementary material for: Easy hydrogel preparation with high-purity lignin separated from DES pretreatment with excellent performance for moisture-electric generators and motion sensors
Source: Royal Society of Chemistry journal article supplement (doi:10.1039/d3ta07115d), 2024-01-01
Supplement: d3ta07115d1.pdf [file d3ta07115d1.pdf]

**Support information for Easy hydrogel preparation with high-purity lignin  
separated from DES pretreatment with excellent-performance for moisture-  
electric generators and motion sensors**

**Table. S1** Different lignins for the hydrogel preparations

| Lignin type  | AlCl <sub>3</sub> ·6H <sub>2</sub> O<br>(g) | AA (g) | APS<br>(mg) | lignin<br>(g) | Water (g) | EG (g) |
|--------------|---------------------------------------------|--------|-------------|---------------|-----------|--------|
| DESL         | 1.8                                         | 2.8    | 25          | 0.03          | 4         | 2.5    |
| CLS          | 1.8                                         | 2.8    | 25          | 0.03          | 4         | 2.5    |
| Kraft lignin | 1.8                                         | 2.8    | 25          | 0.03          | 4         | 2.5    |
| Soda lignin  | 1.8                                         | 2.8    | 25          | 0.03          | 4         | 2.5    |

**Table. S2** The content of Al<sup>3+</sup> of DESL-Al<sup>3+</sup>-PAA hydrogels

| AlCl <sub>3</sub> ·6H <sub>2</sub> O<br>content (%) | AlCl <sub>3</sub> ·6H <sub>2</sub> O<br>(g) | AA (g) | APS<br>(mg) | DESL<br>(g) | Water (g) | EG (g) |
|-----------------------------------------------------|---------------------------------------------|--------|-------------|-------------|-----------|--------|
| 0                                                   | 0                                           | 2.8    | 25          | 0.03        | 4         | 2.5    |
| 3.0                                                 | 0.3                                         | 2.8    | 25          | 0.03        | 4         | 2.5    |
| 6.0                                                 | 0.6                                         | 2.8    | 25          | 0.03        | 4         | 2.5    |
| 9.0                                                 | 0.9                                         | 2.8    | 25          | 0.03        | 4         | 2.5    |
| 12.0                                                | 1.2                                         | 2.8    | 25          | 0.03        | 4         | 2.5    |
| 15.0                                                | 1.5                                         | 2.8    | 25          | 0.03        | 4         | 2.5    |
| 18.0                                                | 1.8                                         | 2.8    | 25          | 0.03        | 4         | 2.5    |

**Table. S3** The content of DESL of DESL-Al<sup>3+</sup>-PAA hydrogels

| DESL content<br>(%) | AlCl <sub>3</sub> ·6H <sub>2</sub> O<br>(g) | AA (g) | APS<br>(mg) | DESL<br>(g) | Water (g) | EG (g) |
|---------------------|---------------------------------------------|--------|-------------|-------------|-----------|--------|
| 0                   | 1.8                                         | 2.8    | 25          | 0           | 4         | 2.5    |
| 0.3                 | 1.8                                         | 2.8    | 25          | 0.03        | 4         | 2.5    |
| 0.6                 | 1.8                                         | 2.8    | 25          | 0.06        | 4         | 2.5    |
| 0.9                 | 1.8                                         | 2.8    | 25          | 0.09        | 4         | 2.5    |
| 1.2                 | 1.8                                         | 2.8    | 25          | 0.12        | 4         | 2.5    |
| 1.5                 | 1.8                                         | 2.8    | 25          | 0.15        | 4         | 2.5    |
| 1.8                 | 1.8                                         | 2.8    | 25          | 0.18        | 4         | 2.5    |

**Table. S4** The ratio of glycol to water of DESL-Al<sup>3+</sup>-PAA hydrogels

| The ratio of<br>EG to water | AlCl <sub>3</sub> ·6H <sub>2</sub> O<br>(g) | AA (g) | APS<br>(mg) | DESL<br>(g) | Water (g) | EG (g) |
|-----------------------------|---------------------------------------------|--------|-------------|-------------|-----------|--------|
| 0                           | 1.8                                         | 2.8    | 25          | 0.03        | 6.5       | 0      |
| 1:12                        | 1.8                                         | 2.8    | 25          | 0.03        | 6         | 0.5    |
| 2:11                        | 1.8                                         | 2.8    | 25          | 0.03        | 5.5       | 1      |
| 5:8                         | 1.8                                         | 2.8    | 25          | 0.03        | 4         | 2.5    |
| 7:6                         | 1.8                                         | 2.8    | 25          | 0.03        | 3         | 3.5    |
| 9:4                         | 1.8                                         | 2.8    | 25          | 0.03        | 2         | 4.5    |

**Table. S5** Start gelation (exothermic) time of hydrogels with different DESL contents(18.0 wt% Al<sup>3+</sup>, 28.0 wt% AA, and 0.25 wt% APS)

| DESL content (wt%) | Start gelation time (min) |
|--------------------|---------------------------|
| 0.3                | 10.5±0.8                  |
| 0.6                | 8.6±0.5                   |
| 0.9                | 5.7±0.5                   |
| 1.2                | 4.3±0.4                   |
| 1.5                | 2.9±0.6                   |
| 1.8                | 1.7±0.2                   |

**Table. S6** Relative atomic contents of C and O in DESL before and after APS oxidation

| Sample   | C (atomic content, %) | O (atomic content, %) |
|----------|-----------------------|-----------------------|
| DESL     | 72.4±0.38             | 20.7±0.34             |
| APS-DESL | 62.1±0.58             | 29.2±0.46             |

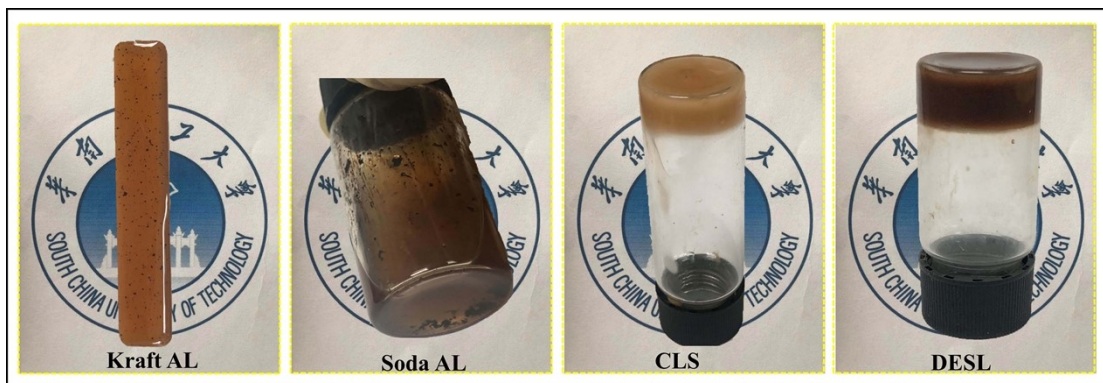

Figure. S1 Hydrogels based on different kinds of lignin.

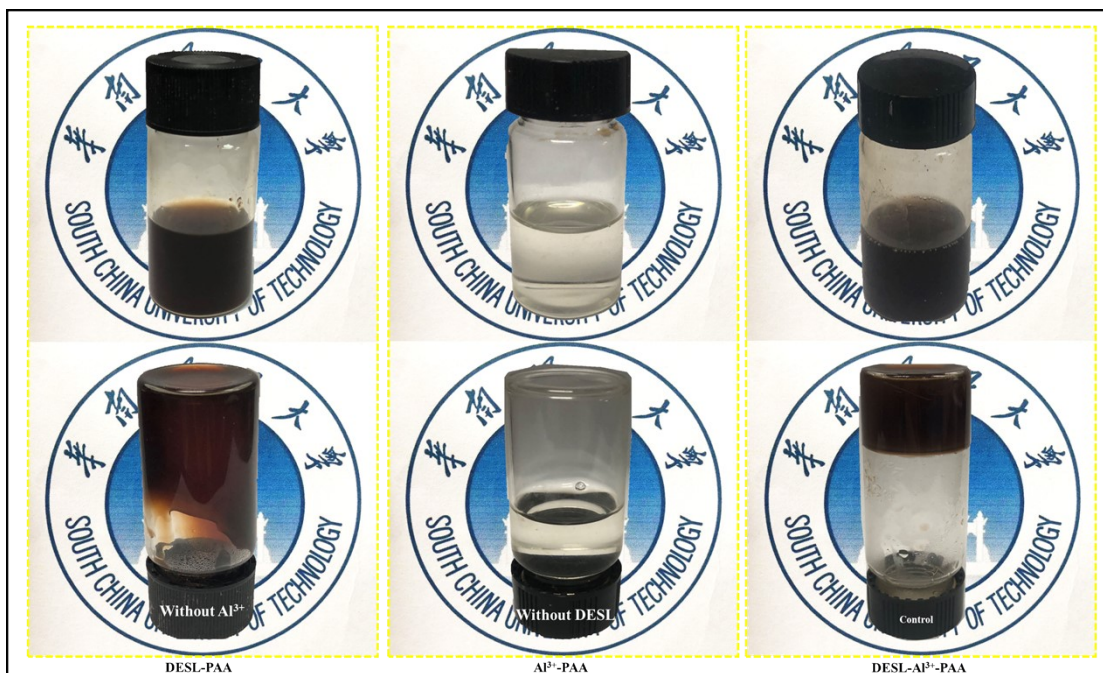

Figure. S2 Experiment with the loss control of DESL and  $Al^{3+}$  in hydrogel preparation.

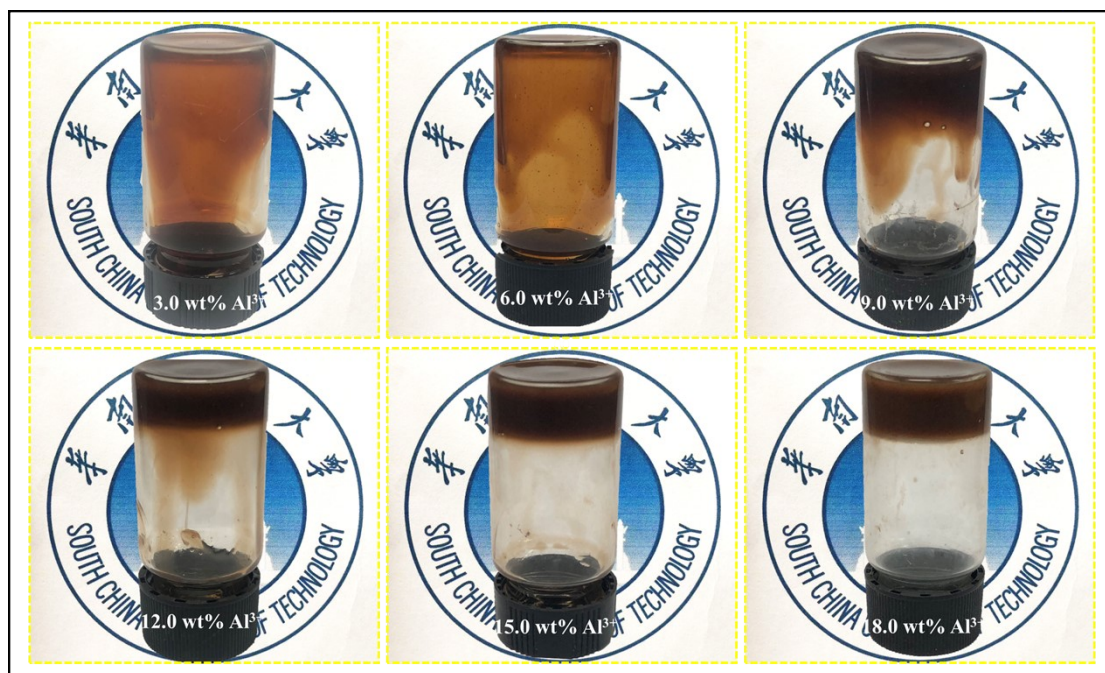

**Figure. S3** Various hydrogels from different  $\text{Al}^{3+}$  contents (28.0 wt% AA, 0.25 wt% APS, and 0.6 wt% DESL).

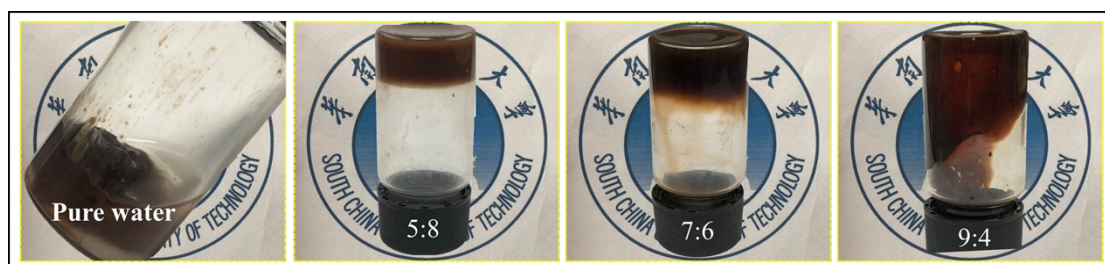

**Figure. S4** Various hydrogels from different ratios of glycol to water (28.0 wt% AA, 0.25 wt% APS, and 0.3 wt% DESL).

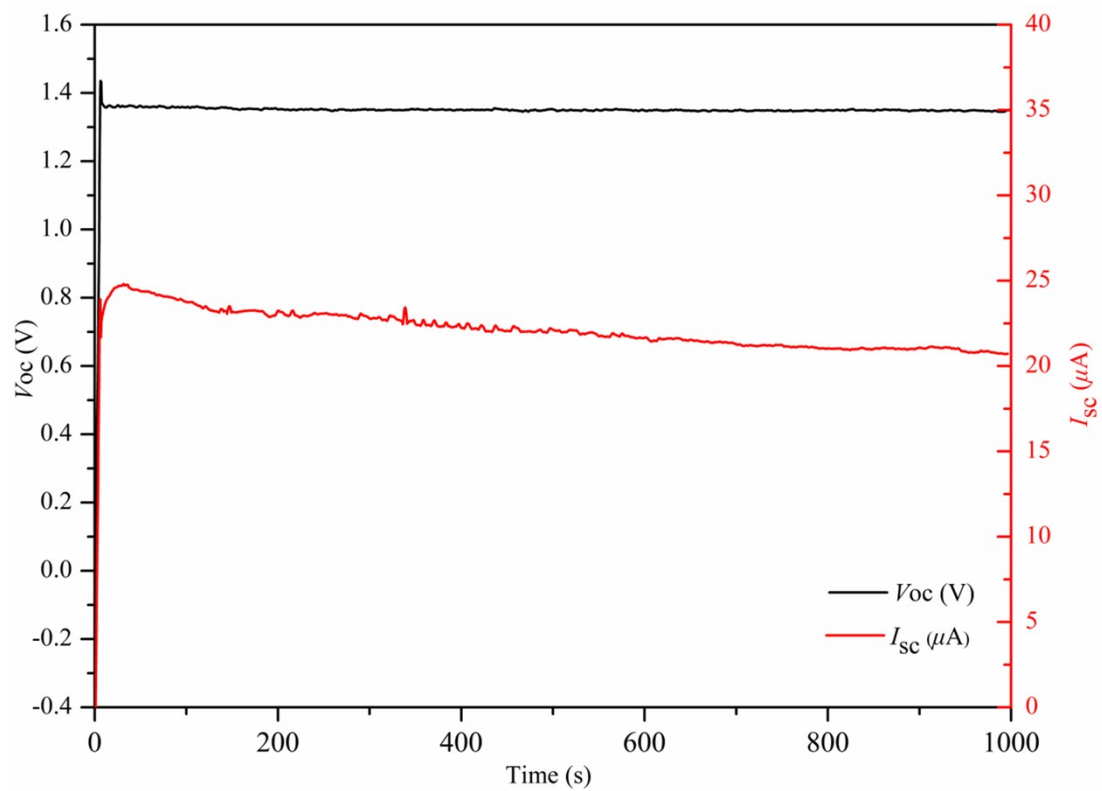

**Figure. S5** The electrical output performance curve of the HMEG test with a duration of 1000 seconds.



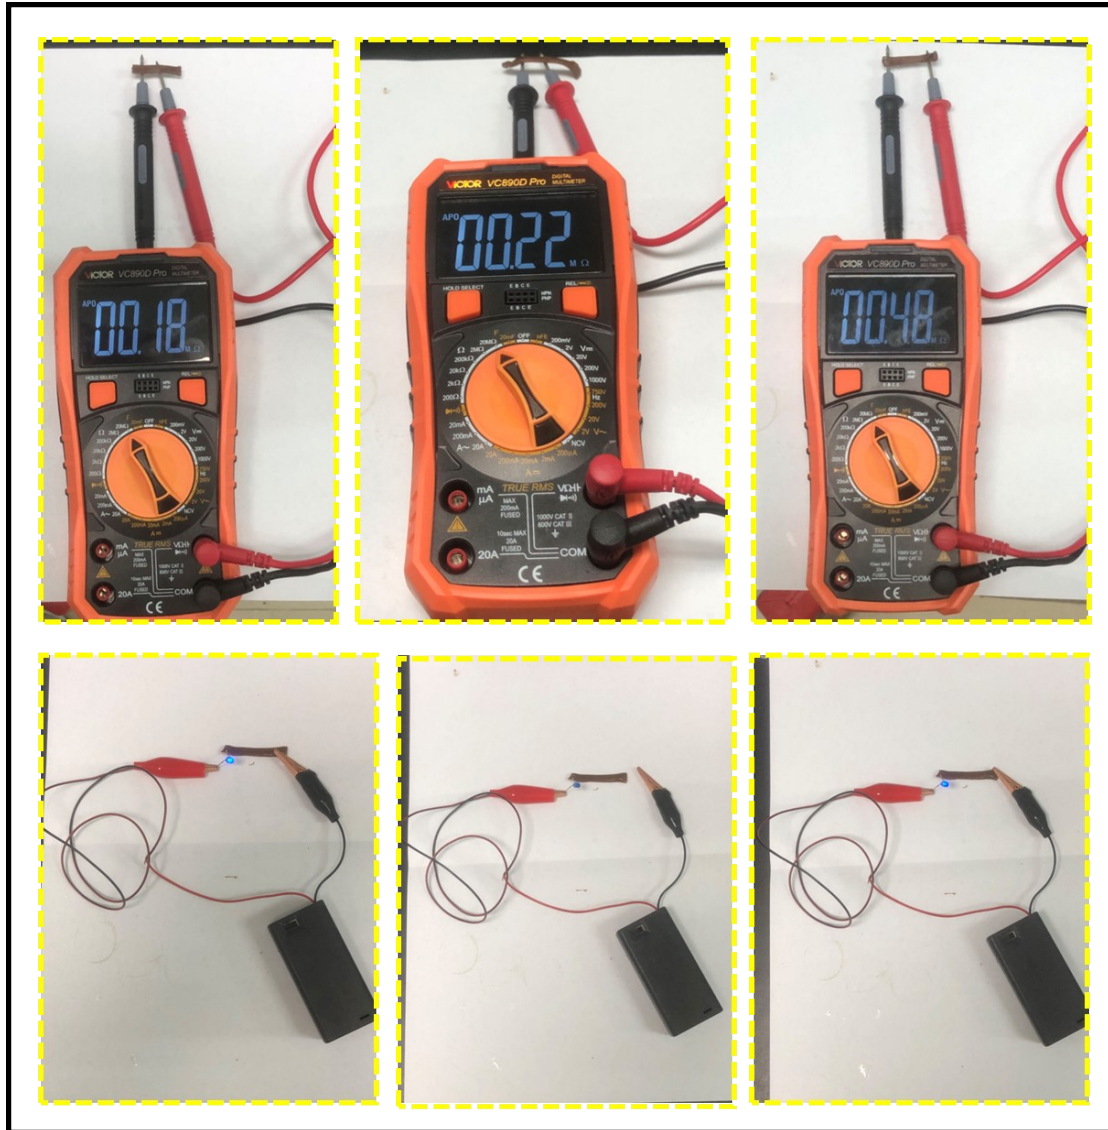

**Figure. S6** (a) Resistance of hydrogels with different lengths. (b) The conductivity of hydrogel lights up the small light bulb.

**Support video:** <https://v.afbcs.cn/LTVm7a>
